# Supplementary material for: Expression and molecular characterization of an intriguing hyaluronan synthase (HAS) from the symbiont “Candidatus Mycoplasma liparidae” in snailfish
Source: PeerJ. 2025 Apr 25;13:e19253. doi: 10.7717/peerj.19253 (PMC12036578; doi:10.7717/peerj.19253)
Supplement: Supplemental Information 5 [file peerj-13-19253-s005.xlsx]

## Sheet: Sheet1
The test of snHAS
	Concentration of GlcNAc(mM)	OD600				Standard
	0	2.2455	2.7437	2.5362		Concentration of HA(ng/ml)	OD600
	0.01	2.1587	2.2816	2.0927		12	0.1784
	0.05	2.0843	1.9298	1.9472		6	0.3478
	0.1	1.7774	1.7991	1.7886		3	0.8347
	0.2	1.1917	1.2114	1.1679		1.5	1.6744
	0.4	1.1581	1.2148	1.2212		0.75	2.1212
	0.6	1.1363	1.1722	1.1212
	0.8	1.1151	1.2042	1.1231
	1	1.2794	1.1097	1.125
	Concentration of GlcA(mM)	OD600				Standard
	0	4.0798	4.2122	4.1324		Concentration of HA(ng/ml)	OD600
	0.01	3.3301	3.1289	3.3478		64	1.2841
	0.025	2.3167	2.3238	2.2195		32	1.6523
	0.05	2.4503	2.6563	2.8757		16	2.0732
	0.1	2.5379	2.3933	2.7427		8	2.5073
	0.25	2.2011	2.3979	2.5437		4	2.9098
	0.5	2.4314	2.4319	2.4185
The test of the mutant of snHAS						Standard
	Concentration of GlcNAc(mM)	OD600				Concentration of HA(ng/ml)	OD600
	1	1.1906	1.2053	0.9658		64	0.7667
	0.8	0.8946	0.6175	0.7717		32	1.5939
	0.6	1.436	1.0423	1.8057		16	2.5553
	0.4	1.6856	1.2786	2.0928		8	3.1823
	0.2	2.2144	2.2213	2.2076		4	3.1619
	0	3.2388	3.2405	3.3115
	Concentration of GlcA(mM)	OD600
	1	0.6952	0.9303	0.8128
	0.8	0.8338	0.7963	0.7584
	0.6	0.886	0.9152	0.9004
	0.4	1.214	1.3435	1.8984
	0.2	1.7537	0.8814	1.3176
	0	3.4188	3.2304	3.3217
